# Supplementary material
Source: PubMed Central journal article supplement (PMC5435512)

Supplementary Figure 3

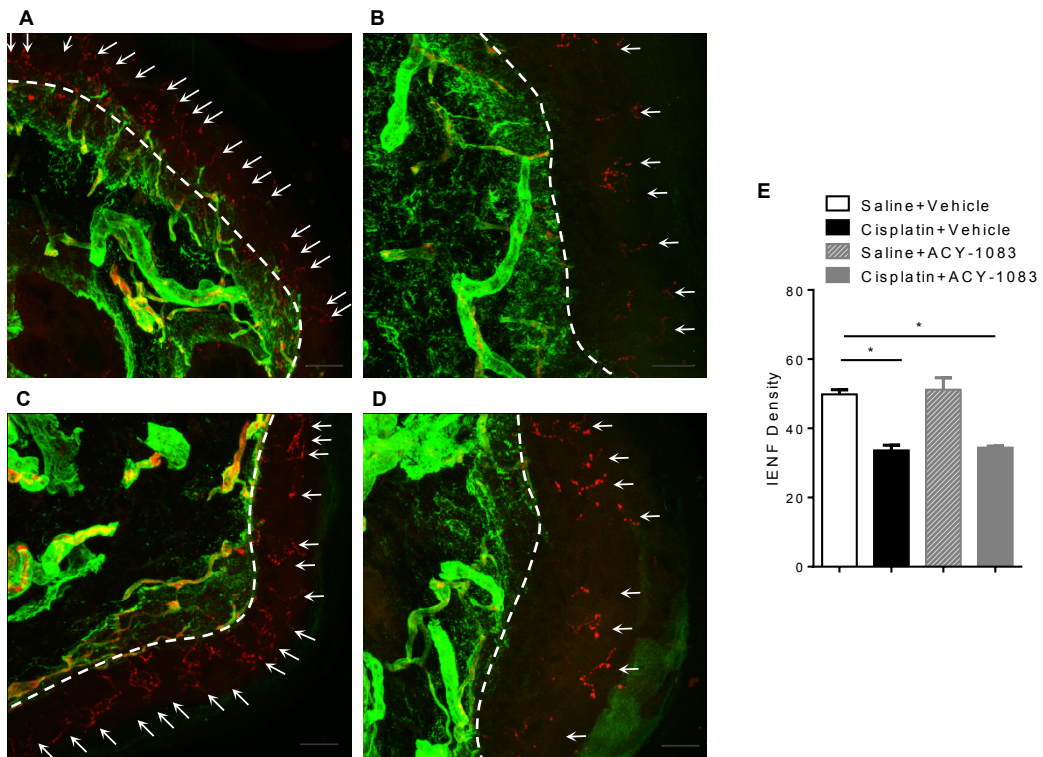

Supplement: NIHMS856416-supplement-_1.pdf [file NIHMS856416-supplement-_1.pdf]

Supplementary Figure 1

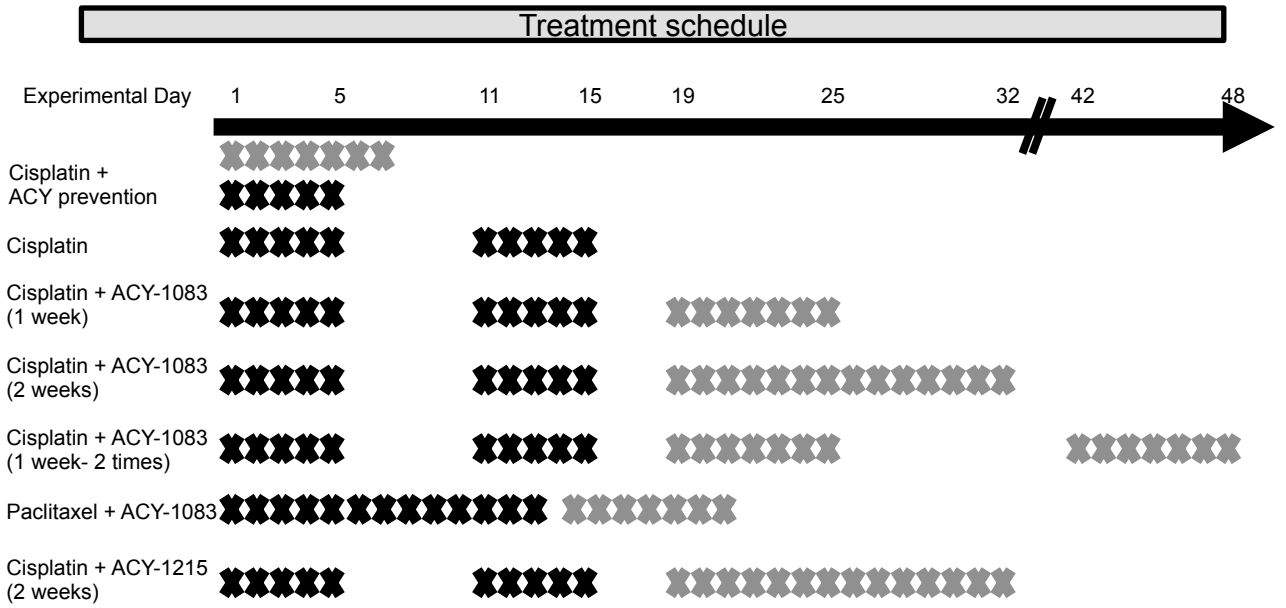

Supplement: NIHMS856416-supplement-_2.pdf [file NIHMS856416-supplement-_2.pdf]

Supplementary Figure 2

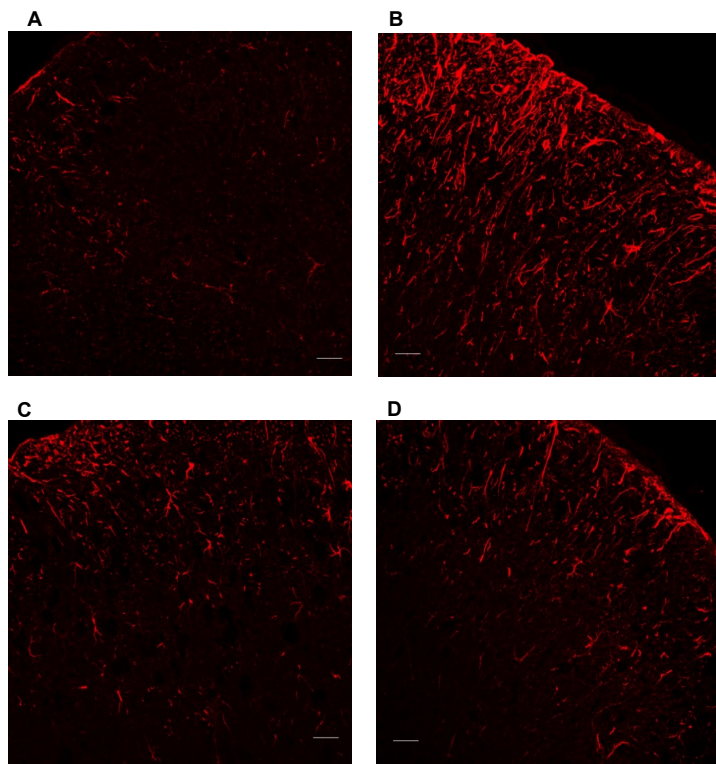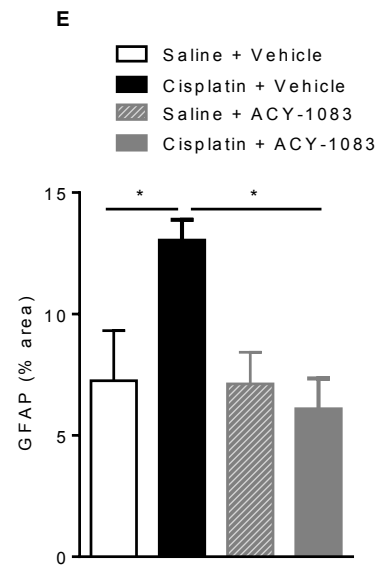

Supplement: NIHMS856416-supplement-_3.pdf [file NIHMS856416-supplement-_3.pdf]
